# Supplementary material for: Physico-Chemically Distinct Nanomaterials Synthesized from Derivates of a Poly(Anhydride) Diversify the Spectrum of Loadable Antibiotics
Source: MDPI journal article supplement (doi:10.3390/nano10030486), 2020-03-08
Supplement: s1 [file s1]

Supplementary figure 1

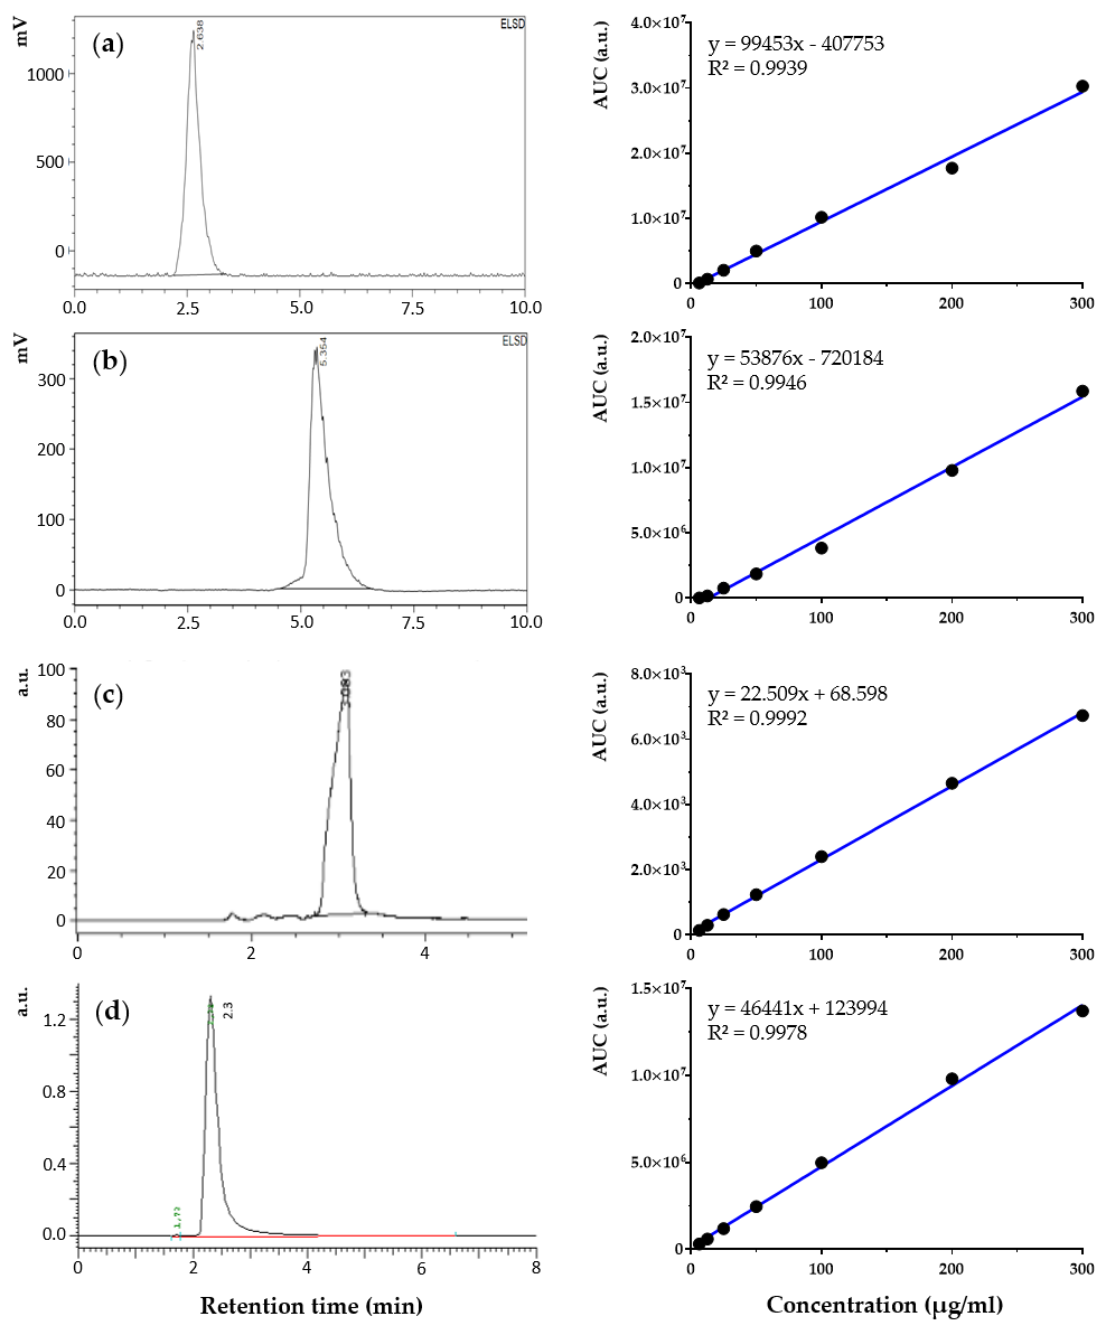

**Figure S1.** Representative HPLC chromatograms (left panels) and calibration curves (right panels) of (a) amikacin, (b) neomycin, (c) cefotaxime and (d) ciprofloxacin. Linear regressions are drawn in blue and the corresponding formulas and  $R^2$  included in the insets. a.u., arbitrary units.
